# Supplementary material
Source: PubMed Central journal article supplement (PMC6873699)
Supplement: NIHMS1522995-supplement-1.pdf [file NIHMS1522995-supplement-1.pdf]

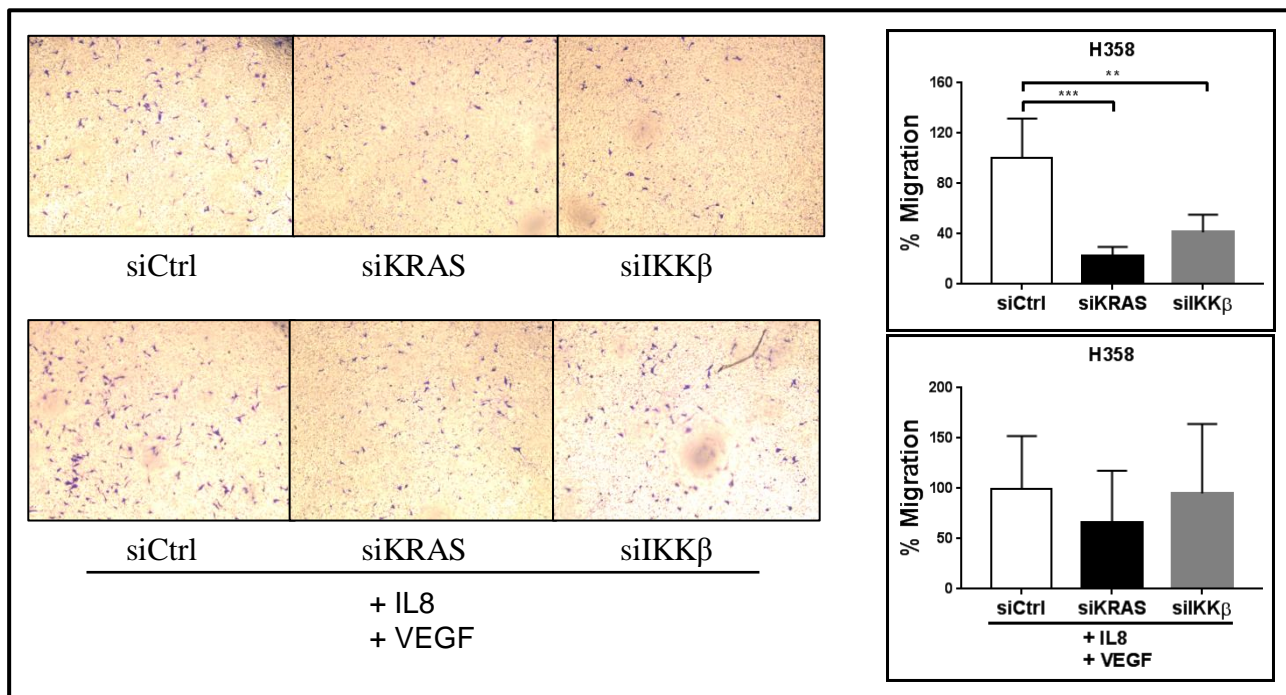

**Supplementary Figure 1. siRNA-mediated inhibition of KRAS or IKK $\beta$  expression in H358 cells decreases HUVEC migration in a VEGF/IL-8-dependent manner.** H358 cells were transfected with a non-targeting control siRNA (siCtrl) or with siRNA smartpools targeting KRAS (siKRAS) or IKK $\beta$  (siIKK $\beta$ ) and conditioned medium was collected as described in methods. Transwell migration assay of HUVEC cells was performed using conditioned medium from H358-transfected cells as chemoattractant as indicated. Conditioned medium was supplemented with 5 ng/ml IL-8 and 5ng/ml VEGF as indicated (lower panel). Images shown are representative of three independent experiments. Statistical significance was measured by one-way ANOVA followed by Bonferroni's post-test (\*\*p<0.01, \*\*\*p<0.001). Error bars represent average  $\pm$  1s.d.
